# Supplementary material for: Evolution of four gene families with patchy phylogenetic distributions: influx of genes into protist genomes
Source: PubMed Central journal article supplement (PMC1484493; doi:10.1186/1471-2148-6-27), 2006-03-21
Supplement: 1471-2148-6-27-S1.pdf [file 1471-2148-6-27-S1.pdf]

## Additional File 1 – Andersson *et al.*

### The hybrid-cluster protein dataset.

| gi         | Short   | Species                                                                 | Domain | Group                         | Comments                                                                    |
|------------|---------|-------------------------------------------------------------------------|--------|-------------------------------|-----------------------------------------------------------------------------|
| 32470344   | Aci.fer | <i>Acidithiobacillus ferrooxidans</i>                                   | B      | $\gamma$ -Proteobacteria      |                                                                             |
| 32033384   | Act.ple | <i>Actinobacillus pleuropneumoniae</i> serovar 1 str. 4074              | B      | $\gamma$ -Proteobacteria      |                                                                             |
| 53765312   | Ana.var | <i>Anabaena variabilis</i> ATCC 29413                                   | B      | Cyanobacteria                 |                                                                             |
| 30263400   | Bac.ant | <i>Bacillus anthracis</i> str. Ames                                     | B      | Low G+C Gram positive         |                                                                             |
| 30021542   | Bac.cer | <i>Bacillus cereus</i> ATCC 14579                                       | B      | Low G+C Gram positive         | 97,1% identity with Bac.ant                                                 |
| 53713436   | Bac.fra | <i>Bacteroides fragilis</i> YCH46                                       | B      | Bacteroidetes/Chlorobi group  |                                                                             |
| 29346097   | Bac.the | <i>Bacteroides thetaiotaomicron</i> VPI-5482                            | B      | Bacteroidetes/Chlorobi group  |                                                                             |
| 46312750   | Bur.cep | <i>Burkholderia cepacia</i> R18194                                      | B      | $\beta$ -Proteobacteria       |                                                                             |
| JGI        | Chl.re1 | <i>Chlamydomonas reinhardtii</i>                                        | E      | Green algae                   |                                                                             |
| JGI        | Chl.re2 | <i>Chlamydomonas reinhardtii</i>                                        | E      | Green algae                   |                                                                             |
| 21674516   | Chl.tep | <i>Chlorobium tepidum</i> TLS                                           | B      | Bacteroidetes/Chlorobi group  |                                                                             |
| 15896007   | Clo.ac1 | <i>Clostridium acetobutylicum</i>                                       | B      | Low G+C Gram positive         |                                                                             |
| 15896669   | Clo.ac2 | <i>Clostridium acetobutylicum</i>                                       | B      | Low G+C Gram positive         |                                                                             |
| 17976847   | Clo.pe1 | <i>Clostridium perfringens</i>                                          | B      | Low G+C Gram positive         |                                                                             |
| 18311566   | Clo.pe2 | <i>Clostridium perfringens</i>                                          | B      | Low G+C Gram positive         | 97,6% identity with Clo.pe1                                                 |
| 28210163   | Clo.tet | <i>Clostridium tetani</i> E88                                           | B      | Low G+C Gram positive         |                                                                             |
| 23021132   | Clo.the | <i>Clostridium thermocellum</i> ATCC 27405                              | B      | Low G+C Gram positive         |                                                                             |
| 23111958   | Des.haf | <i>Desulfitobacterium hafniense</i>                                     | B      | Low G+C Gram positive         |                                                                             |
| 50875631   | Des.ps1 | <i>Desulfotalea psychrophila</i> LSv54                                  | B      | $\delta$ -Proteobacteria      |                                                                             |
| 50876115   | Des.ps2 | <i>Desulfotalea psychrophila</i> LSv54                                  | B      | $\delta$ -Proteobacteria      |                                                                             |
| 50876114   | Des.ps3 | <i>Desulfotalea psychrophila</i> LSv54                                  | B      | $\delta$ -Proteobacteria      |                                                                             |
| 20663611   | Des.de1 | <i>Desulfovibrio desulfuricans</i>                                      | B      | $\delta$ -Proteobacteria      |                                                                             |
| 20663615   | Des.de2 | <i>Desulfovibrio desulfuricans</i>                                      | B      | $\delta$ -Proteobacteria      | 100,0% identity with Des.de1                                                |
| 400847     | Des.de3 | <i>Desulfovibrio desulfuricans</i>                                      | B      | $\delta$ -Proteobacteria      | 100,0% identity with Des.de1                                                |
| 23474024   | Des.de4 | <i>Desulfovibrio desulfuricans</i> G20                                  | B      | $\delta$ -Proteobacteria      |                                                                             |
| 46580947   | Des.vH1 | <i>Desulfovibrio vulgaris</i> subsp. <i>vulgaris</i> str. Hildenborough | B      | $\delta$ -Proteobacteria      |                                                                             |
| 46580421   | Des.vH2 | <i>Desulfovibrio vulgaris</i> subsp. <i>vulgaris</i> str. Hildenborough | B      | $\delta$ -Proteobacteria      |                                                                             |
| 18252516   | Ent.his | <i>Entamoeba histolytica</i>                                            | E      | Entamoebidae                  |                                                                             |
| this study | Ent.in1 | <i>Entamoeba invadens</i>                                               | E      | Entamoebidae                  | frameshift                                                                  |
| this study | Ent.in2 | <i>Entamoeba invadens</i>                                               | E      | Entamoebidae                  |                                                                             |
| this study | Ent.mos | <i>Entamoeba moshkovskii</i>                                            | E      | Entamoebidae                  |                                                                             |
| this study | Ent.ter | <i>Entamoeba terrapinae</i>                                             | E      | Entamoebidae                  | fragment missing 272 of 418 aligned positions - 80,1% identity with Ent.his |
| 49612112   | Erw.car | <i>Erwinia carotovora</i> subsp. <i>atroseptica</i> SCRI1043            | B      | $\gamma$ -Proteobacteria      |                                                                             |
| 1787099    | Esc.co1 | <i>Escherichia coli</i> K12                                             | B      | $\gamma$ -Proteobacteria      |                                                                             |
| 33347490   | Esc.co2 | <i>Escherichia coli</i> K12                                             | B      | $\gamma$ -Proteobacteria      | 100,0% identity with Esc.co1                                                |
| 4062452    | Esc.co3 | <i>Escherichia coli</i> K12                                             | B      | $\gamma$ -Proteobacteria      | 100,0% identity with Esc.co1                                                |
| 19704019   | Fus.nuc | <i>Fusobacterium nucleatum</i> subsp. <i>nucleatum</i> ATCC 25586       | B      | Fusobacteria                  |                                                                             |
| 48844072   | Geo.met | <i>Geobacter metallireducens</i> GS-15                                  | B      | $\delta$ -Proteobacteria      |                                                                             |
| 39995780   | Geo.sul | <i>Geobacter sulfurreducens</i> PCA                                     | B      | $\delta$ -Proteobacteria      | 96,2% identity with Geo.met                                                 |
| 18252518   | Gia.lam | <i>Giardia intestinalis</i>                                             | E      | Diplomonad                    |                                                                             |
| 48832063   | Mag.sp. | <i>Magnetococcus</i> sp. MC-1                                           | B      | Proteobacteria (unclassified) |                                                                             |
| 52306398   | Man.suc | <i>Mannheimia succiniciproducens</i> MBEL55E                            | B      | $\gamma$ -Proteobacteria      | 95,7% identity with Act.ple                                                 |
| this study | Mas.bal | <i>Mastigamoeba balamuthi</i>                                           | E      | Pelobiont                     |                                                                             |
| 15668946   | Met.ja1 | <i>Methanocaldococcus jannaschii</i>                                    | A      | Euryarchaeota                 |                                                                             |
| 7397414    | Met.ja2 | <i>Methanocaldococcus jannaschii</i>                                    | A      | Euryarchaeota                 | 100,0% identity with Met.ja1                                                |
| 46142247   | Met.bu1 | <i>Methanococcoides burtonii</i> DSM 6242                               | A      | Euryarchaeota                 |                                                                             |
| 53731535   | Met.bu2 | <i>Methanococcoides burtonii</i> DSM 6242                               | A      | Euryarchaeota                 |                                                                             |
| 45358283   | Met.mar | <i>Methanococcus maripaludis</i> S2                                     | A      | Euryarchaeota                 |                                                                             |
| 21229315   | Met.maz | <i>Methanosarcina mazei</i> Goe1                                        | A      | Euryarchaeota                 |                                                                             |
| 7404412    | Met.the | <i>Methanothermobacter thermautotrophicus</i> str. Delta H              | A      | Euryarchaeota                 |                                                                             |
| 49235681   | Mor.the | <i>Moorella thermoacetica</i>                                           | B      | Low G+C Gram positive         |                                                                             |
| this study | Nae.gru | <i>Naegleria gruberi</i>                                                | E      | Heterolobosea                 |                                                                             |
| 26522739   | Pho.pho | <i>Photobacterium phosphoreum</i>                                       | B      | $\gamma$ -Proteobacteria      |                                                                             |
| 34540658   | Por.gin | <i>Porphyromonas gingivalis</i> W83                                     | B      | Bacteroidetes/Chlorobi group  |                                                                             |
| 14521200   | Pyr.abv | <i>Pyrococcus abyssi</i>                                                | A      | Euryarchaeota                 |                                                                             |
| 18977064   | Pyr.fur | <i>Pyrococcus furiosus</i> DSM 3638                                     | A      | Euryarchaeota                 |                                                                             |
| 33415324   | Rho.cap | <i>Rhodobacter capsulatus</i>                                           | B      | $\alpha$ -Proteobacteria      |                                                                             |
| 22966189   | Rho.rub | <i>Rhodospirillum rubrum</i>                                            | B      | $\alpha$ -Proteobacteria      |                                                                             |
| 16759810   | Sal.ent | <i>Salmonella enterica</i> subsp. <i>enterica</i>                       | B      | $\gamma$ -Proteobacteria      | 96,4% identity with Esc.co1                                                 |

---

|          |         | serovar Typhi                                 |   |                            |                             |
|----------|---------|-----------------------------------------------|---|----------------------------|-----------------------------|
| 16764299 | Sal.typ | <i>Salmonella typhimurium</i> LT2             | B | $\gamma$ -Proteobacteria   | 96,6% identity with Esc.co1 |
| 24372941 | She.one | <i>Shewanella oneidensis</i> MR-1             | B | $\gamma$ -Proteobacteria   |                             |
| 24112244 | Shi.fle | <i>Shigella flexneri</i> 2a str. 301          | B | $\gamma$ -Proteobacteria   | 99,5% identity with Esc.co1 |
| 27983818 | Spi.bar | <i>Spironucleus barkhanus</i>                 | E | Diplomonad                 |                             |
| 51892166 | Sym.the | <i>Symbiobacterium thermophilum</i> IAM 14863 | B | High G+C Gram positive     |                             |
| JGI      | Tha.pse | <i>Thalassiosira pseudonana</i>               | E | Diatom                     |                             |
| 20809101 | The.ten | <i>Thermoanaerobacter tengcongensis</i>       | B | Low G+C Gram positive      |                             |
| 15643928 | The.mar | <i>Thermotoga maritima</i>                    | B | Thermotogales              |                             |
| 42525995 | Tre.den | <i>Treponema denticola</i> ATCC 35405         | B | Spirochete                 |                             |
| 18252520 | Tri.va1 | <i>Trichomonas vaginalis</i>                  | E | Parabasalid                |                             |
| TIGR     | Tri.va2 | <i>Trichomonas vaginalis</i>                  | E | Parabasalid                |                             |
| 59714046 | Vib.fis | <i>Vibrio fischeri</i> ES114                  | B | $\gamma$ -Proteobacteria   |                             |
| 28897963 | Vib.par | <i>Vibrio parahaemolyticus</i> RIMD 2210633   | B | $\gamma$ -Proteobacteria   |                             |
| 27366144 | Vib.vul | <i>Vibrio vulnificus</i> CMCP6                | B | $\gamma$ -Proteobacteria   | 96,6% identity with Vib.par |
| 34557553 | Wol.suc | <i>Wolinella succinogenes</i>                 | B | $\epsilon$ -Proteobacteria |                             |
| 22126696 | Yer.pes | <i>Yersinia pestis</i> KIM                    | B | $\gamma$ -Proteobacteria   |                             |
| 56542587 | Zym.mob | <i>Zymomonas mobilis</i> subsp. mobilis ZM4   | B | $\alpha$ -Proteobacteria   |                             |

---

## The A-type flavoprotein dataset.

| gi         | Short   | Species                                                          | Domain | Group                        | Comment                                                                      |
|------------|---------|------------------------------------------------------------------|--------|------------------------------|------------------------------------------------------------------------------|
| 37913107   | Aer.hyd | <i>Aeromonas hydrophila</i>                                      | B      | $\gamma$ -Proteobacteria     | fragment missing 120 of 269 aligned positions – 91,5% identical with Erw.car |
| 45510255   | Ana.va1 | <i>Anabaena variabilis</i> ATCC 29413                            | B      | Cyanobacteria                | 99,3% identity with Nos.sp5                                                  |
| 53764133   | Ana.va2 | <i>Anabaena variabilis</i> ATCC 29413                            | B      | Cyanobacteria                | 96,3% identity with Nos.sp3                                                  |
| 53764449   | Ana.va3 | <i>Anabaena variabilis</i> ATCC 29413                            | B      | Cyanobacteria                | 97,8% identity with Nos.sp1                                                  |
| 53764450   | Ana.va4 | <i>Anabaena variabilis</i> ATCC 29413                            | B      | Cyanobacteria                | 100,0% identity with Nos.sp2                                                 |
| 45510253   | Ana.va5 | <i>Anabaena variabilis</i> ATCC 29413                            | B      | Cyanobacteria                | 97,0% identity with Nos.sp6                                                  |
| 53764134   | Ana.va6 | <i>Anabaena variabilis</i> ATCC 29413                            | B      | Cyanobacteria                | 96,3% identity with Nos.sp4                                                  |
| 11497784   | Arc.fu1 | <i>Archaeoglobus fulgidus</i> DSM 4304                           | A      | Euryarchaeota                |                                                                              |
| 11499115   | Arc.fu2 | <i>Archaeoglobus fulgidus</i> DSM 4304                           | A      | Euryarchaeota                |                                                                              |
| 56475711   | Azo.spE | <i>Azoarcus</i> sp. EbN1                                         | B      | $\beta$ -Proteobacteria      |                                                                              |
| 60491887   | Bac.fra | <i>Bacteroides fragilis</i> NCTC 9343                            | B      | Bacteroidetes/Chlorobi group |                                                                              |
| 29349534   | Bac.the | <i>Bacteroides thetaiotaomicron</i> VPI-5482                     | B      | Bacteroidetes/Chlorobi group |                                                                              |
| 21675091   | Chl.tep | <i>Chlorobium tepidum</i> TLS                                    | B      | Bacteroidetes/Chlorobi group |                                                                              |
| 15894314   | Clo.ac1 | <i>Clostridium acetobutylicum</i>                                | B      | Low G+C Gram positives       |                                                                              |
| 15895714   | Clo.ac2 | <i>Clostridium acetobutylicum</i>                                | B      | Low G+C Gram positives       |                                                                              |
| 18309270   | Clo.pe1 | <i>Clostridium perfringens</i>                                   | B      | Low G+C Gram positives       |                                                                              |
| 18309763   | Clo.pe2 | <i>Clostridium perfringens</i>                                   | B      | Low G+C Gram positives       |                                                                              |
| 18309996   | Clo.pe3 | <i>Clostridium perfringens</i>                                   | B      | Low G+C Gram positives       |                                                                              |
| 28210710   | Clo.te1 | <i>Clostridium tetani</i> E88                                    | B      | Low G+C Gram positives       |                                                                              |
| 28211064   | Clo.te2 | <i>Clostridium tetani</i> E88                                    | B      | Low G+C Gram positives       |                                                                              |
| 28211481   | Clo.te3 | <i>Clostridium tetani</i> E88                                    | B      | Low G+C Gram positives       |                                                                              |
| 28211510   | Clo.te4 | <i>Clostridium tetani</i> E88                                    | B      | Low G+C Gram positives       |                                                                              |
| 23020486   | Clo.the | <i>Clostridium thermocellum</i> ATCC 27405                       | B      | Low G+C Gram positives       |                                                                              |
| 45528365   | Cro.wa1 | <i>Crocospaera watsonii</i> WH 8501                              | B      | Cyanobacteria                |                                                                              |
| 45527451   | Cro.wa2 | <i>Crocospaera watsonii</i> WH 8501                              | B      | Cyanobacteria                |                                                                              |
| 41722689   | Dec.aro | <i>Dechloromonas aromatica</i> RCB                               | B      | $\beta$ -Proteobacteria      |                                                                              |
| 50876536   | Des.ps1 | <i>Desulfotalea psychrophila</i> LSv54                           | B      | $\delta$ -Proteobacteria     |                                                                              |
| 50877008   | Des.ps2 | <i>Desulfotalea psychrophila</i> LSv54                           | B      | $\delta$ -Proteobacteria     |                                                                              |
| 50876535   | Des.ps3 | <i>Desulfotalea psychrophila</i> LSv54                           | B      | $\delta$ -Proteobacteria     |                                                                              |
| 23473638   | Des.des | <i>Desulfovibrio desulfuricans</i> G20                           | B      | $\delta$ -Proteobacteria     |                                                                              |
| 14916694   | Des.gig | <i>Desulfovibrio gigas</i>                                       | B      | $\delta$ -Proteobacteria     |                                                                              |
| 46581587   | Des.vu1 | <i>Desulfovibrio vulgaris</i> subsp. vulgaris str. Hildenborough | B      | $\delta$ -Proteobacteria     |                                                                              |
| 46580422   | Des.vu2 | <i>Desulfovibrio vulgaris</i> subsp. vulgaris str. Hildenborough | B      | $\delta$ -Proteobacteria     |                                                                              |
| 56474182   | Ent.hi1 | <i>Entamoeba histolytica</i>                                     | E      | Entamoebidae                 |                                                                              |
| 56471042   | Ent.hi2 | <i>Entamoeba histolytica</i>                                     | E      | Entamoebidae                 |                                                                              |
| 56468393   | Ent.hi3 | <i>Entamoeba histolytica</i>                                     | E      | Entamoebidae                 |                                                                              |
| 56468595   | Ent.hi4 | <i>Entamoeba histolytica</i>                                     | E      | Entamoebidae                 |                                                                              |
| this study | Ent.inv | <i>Entamoeba invadens</i>                                        | E      | Entamoebidae                 |                                                                              |
| this study | Ent.mo1 | <i>Entamoeba moshkovskii</i>                                     | E      | Entamoebidae                 |                                                                              |
| this study | Ent.mo2 | <i>Entamoeba moshkovskii</i>                                     | E      | Entamoebidae                 |                                                                              |
| this study | Ent.ter | <i>Entamoeba terrapinae</i>                                      | E      | Entamoebidae                 |                                                                              |
| 49610370   | Erw.car | <i>Erwinia carotovora</i> subsp. atroseptica SCRI1043            | B      | $\gamma$ -Proteobacteria     |                                                                              |
| 16130617   | Esc.col | <i>Escherichia coli</i> K12                                      | B      | $\gamma$ -Proteobacteria     |                                                                              |
| 19703847   | Fus.nu1 | <i>Fusobacterium nucleatum</i> subsp. nucleatum ATCC 25586       | B      | Fusobacteria                 |                                                                              |
| 19704755   | Fus.nu2 | <i>Fusobacterium nucleatum</i> subsp. nucleatum ATCC 25586       | B      | Fusobacteria                 |                                                                              |
| 23055925   | Geo.me1 | <i>Geobacter metallireducens</i>                                 | B      | $\delta$ -Proteobacteria     |                                                                              |
| 23056906   | Geo.me2 | <i>Geobacter metallireducens</i>                                 | B      | $\delta$ -Proteobacteria     | 100,0% identity with Geo.me1                                                 |
| 39998383   | Geo.sul | <i>Geobacter sulfurreducens</i> PCA                              | B      | $\delta$ -Proteobacteria     |                                                                              |
| 27981645   | Gia.lam | <i>Giardia intestinalis</i>                                      | E      | Diplomonads                  |                                                                              |
| 37521344   | Glo.vi1 | <i>Gloeobacter violaceus</i>                                     | B      | Cyanobacteria                |                                                                              |
| 37521345   | Glo.vi2 | <i>Gloeobacter violaceus</i>                                     | B      | Cyanobacteria                |                                                                              |
| this study | Mas.bal | <i>Mastigamoeba balamuthi</i>                                    | E      | Pelobionts                   |                                                                              |
| 46141957   | Met.bur | <i>Methanococcoides burtonii</i> DSM 6242                        | A      | Euryarchaeota                |                                                                              |
| 15668714   | Met.ja1 | <i>Methanococcus jannaschii</i>                                  | A      | Euryarchaeota                |                                                                              |
| 15668913   | Met.ja2 | <i>Methanococcus jannaschii</i>                                  | A      | Euryarchaeota                |                                                                              |
| 15668929   | Met.ja3 | <i>Methanococcus jannaschii</i>                                  | A      | Euryarchaeota                |                                                                              |
| 2127904    | Met.ja4 | <i>Methanococcus jannaschii</i>                                  | A      | Euryarchaeota                | 100,0% identity with Met.ja1                                                 |
| 45047591   | Met.ma1 | <i>Methanococcus maripaludis</i> S2                              | A      | Euryarchaeota                |                                                                              |
| 45047564   | Met.ma2 | <i>Methanococcus maripaludis</i> S2                              | A      | Euryarchaeota                |                                                                              |
| 45047563   | Met.ma3 | <i>Methanococcus maripaludis</i> S2                              | A      | Euryarchaeota                | 95,9% identity with Met.ma2                                                  |
| 20092195   | Met.ac1 | <i>Methanosarcina acetivorans</i> str. C2A                       | A      | Euryarchaeota                |                                                                              |
| 20092541   | Met.ac2 | <i>Methanosarcina acetivorans</i> str. C2A                       | A      | Euryarchaeota                |                                                                              |

|            |         |                                                              |   |                              |                              |
|------------|---------|--------------------------------------------------------------|---|------------------------------|------------------------------|
| 48837637   | Met.bar | <i>Methanosarcina barkeri</i> str. fusaro                    | A | Euryarchaeota                |                              |
| 21229289   | Met.maz | <i>Methanosarcina mazei</i> Goe1                             | A | Euryarchaeota                |                              |
| 21362551   | Met.mar | <i>Methanothermobacter marburgensis</i> str. Marburg         | A | Euryarchaeota                |                              |
| 15678185   | Met.th1 | <i>Methanothermobacter thermautotrophicus</i> str. Delta H   | A | Euryarchaeota                |                              |
| 15678248   | Met.th2 | <i>Methanothermobacter thermautotrophicus</i> str. Delta H   | A | Euryarchaeota                |                              |
| 2127680    | Met.th3 | <i>Methanothermobacter thermautotrophicus</i> str. Delta H   | A | Euryarchaeota                |                              |
| 21362560   | Moo.the | <i>Moorella thermoacetica</i>                                | B | Low G+C Gram positives       |                              |
| 23123589   | Nos.pu1 | <i>Nostoc punctiforme</i>                                    | B | Cyanobacteria                |                              |
| 23123808   | Nos.pu2 | <i>Nostoc punctiforme</i>                                    | B | Cyanobacteria                |                              |
| 23123810   | Nos.pu3 | <i>Nostoc punctiforme</i>                                    | B | Cyanobacteria                |                              |
| 23123861   | Nos.pu4 | <i>Nostoc punctiforme</i>                                    | B | Cyanobacteria                |                              |
| 23129575   | Nos.pu5 | <i>Nostoc punctiforme</i>                                    | B | Cyanobacteria                |                              |
| 23129576   | Nos.pu6 | <i>Nostoc punctiforme</i>                                    | B | Cyanobacteria                |                              |
| 17227673   | Nos.sp1 | <i>Nostoc</i> sp. PCC 7120                                   | B | Cyanobacteria                |                              |
| 17227674   | Nos.sp2 | <i>Nostoc</i> sp. PCC 7120                                   | B | Cyanobacteria                |                              |
| 17231383   | Nos.sp3 | <i>Nostoc</i> sp. PCC 7120                                   | B | Cyanobacteria                |                              |
| 17231387   | Nos.sp4 | <i>Nostoc</i> sp. PCC 7120                                   | B | Cyanobacteria                |                              |
| 17231936   | Nos.sp5 | <i>Nostoc</i> sp. PCC 7120                                   | B | Cyanobacteria                |                              |
| 17231938   | Nos.sp6 | <i>Nostoc</i> sp. PCC 7120                                   | B | Cyanobacteria                |                              |
| 54308337   | Pho.pro | <i>Photobacterium profundum</i> SS9                          | B | $\gamma$ -Proteobacteria     |                              |
| 34540586   | Por.gin | <i>Porphyromonas gingivalis</i> W83                          | B | Bacteroidetes/Chlorobi group |                              |
| 33864428   | Pro.mM1 | <i>Prochlorococcus marinus</i> str. MIT 9313                 | B | Cyanobacteria                |                              |
| 33864429   | Pro.mM2 | <i>Prochlorococcus marinus</i> str. MIT 9313                 | B | Cyanobacteria                |                              |
| 33239496   | Pro.mC1 | <i>Prochlorococcus marinus</i> subsp. marinus str. CCMP1375  | B | Cyanobacteria                |                              |
| 33239497   | Pro.mC2 | <i>Prochlorococcus marinus</i> subsp. marinus str. CCMP1375  | B | Cyanobacteria                |                              |
| 33860602   | Pro.mC3 | <i>Prochlorococcus marinus</i> subsp. pastoris str. CCMP1378 | B | Cyanobacteria                |                              |
| 33860603   | Pro.mC4 | <i>Prochlorococcus marinus</i> subsp. pastoris str. CCMP1378 | B | Cyanobacteria                |                              |
| 14521096   | Pyr.abv | <i>Pyrococcus abyssi</i>                                     | A | Euryarchaeota                |                              |
| 18977066   | Pyr.fu1 | <i>Pyrococcus furiosus</i> DSM 3638                          | A | Euryarchaeota                |                              |
| 18977123   | Pyr.fu2 | <i>Pyrococcus furiosus</i> DSM 3638                          | A | Euryarchaeota                |                              |
| 14590919   | Pyr.hor | <i>Pyrococcus horikoshii</i>                                 | A | Euryarchaeota                |                              |
| 1075539    | Rho.ca1 | <i>Rhodobacter capsulatus</i>                                | B | $\alpha$ -Proteobacteria     | 97,0% identity with Rho.ca2  |
| 21431763   | Rho.ca2 | <i>Rhodobacter capsulatus</i>                                | B | $\alpha$ -Proteobacteria     |                              |
| 22958095   | Rho.sph | <i>Rhodobacter sphaeroides</i>                               | B | $\alpha$ -Proteobacteria     |                              |
| 16761617   | Sal.ent | <i>Salmonella enterica</i> subsp. enterica serovar Typhi     | B | $\gamma$ -Proteobacteria     | 96,3% identity with Esc.col  |
| 16766146   | Sal.typ | <i>Salmonella typhimurium</i> LT2                            | B | $\gamma$ -Proteobacteria     | 96,3% identity with Esc.col  |
| 24114007   | Shi.fle | <i>Shigella flexneri</i> 2a str. 301                         | B | $\gamma$ -Proteobacteria     | 99,3% identity with Esc.col  |
| 27984029   | Spi.bar | <i>Spironucleus barkhanus</i>                                | E | Diplomonads                  |                              |
| 56752293   | Syn.el1 | <i>Synechococcus elongatus</i> PCC 6301                      | B | Cyanobacteria                |                              |
| 45513282   | Syn.el2 | <i>Synechococcus elongatus</i> PCC 6301                      | B | Cyanobacteria                | 100,0% identity with Syn.el1 |
| 56752292   | Syn.el3 | <i>Synechococcus elongatus</i> PCC 6301                      | B | Cyanobacteria                |                              |
| 45513283   | Syn.el4 | <i>Synechococcus elongatus</i> PCC 6301                      | B | Cyanobacteria                | 99,6% identity with Syn.el3  |
| 33866897   | Syn.sW1 | <i>Synechococcus</i> sp. WH 8102                             | B | Cyanobacteria                |                              |
| 33866898   | Syn.sW2 | <i>Synechococcus</i> sp. WH 8102                             | B | Cyanobacteria                |                              |
| 16329320   | Syn.sP1 | <i>Synechocystis</i> sp. PCC 6803                            | B | Cyanobacteria                |                              |
| 16329322   | Syn.sP2 | <i>Synechocystis</i> sp. PCC 6803                            | B | Cyanobacteria                |                              |
| 16331061   | Syn.sP3 | <i>Synechocystis</i> sp. PCC 6803                            | B | Cyanobacteria                |                              |
| 16331685   | Syn.sP4 | <i>Synechocystis</i> sp. PCC 6803                            | B | Cyanobacteria                |                              |
| 20807480   | The.ten | <i>Thermoanaerobacter tengcongensis</i>                      | B | Low G+C Gram positives       |                              |
| 57159073   | The.kod | <i>Thermococcus kodakaraensis</i> KOD1                       | A | Euryarchaeota                |                              |
| 22298632   | The.el1 | <i>Thermosynechococcus elongatus</i> BP-1                    | B | Cyanobacteria                |                              |
| 22298916   | The.el2 | <i>Thermosynechococcus elongatus</i> BP-1                    | B | Cyanobacteria                |                              |
| 15643518   | The.mar | <i>Thermotoga maritima</i>                                   | B | Thermotogales                |                              |
| 42526588   | Tre.den | <i>Treponema denticola</i> ATCC 35405                        | B | Spirochetes                  |                              |
| 23039893   | Tri.er1 | <i>Trichodesmium erythraeum</i> IMS101                       | B | Cyanobacteria                |                              |
| 23043405   | Tri.er2 | <i>Trichodesmium erythraeum</i> IMS101                       | B | Cyanobacteria                |                              |
| this study | Tri.va1 | <i>Trichomonas vaginalis</i>                                 | E | Parabasalids                 |                              |
| TIGR       | Tri.va2 | <i>Trichomonas vaginalis</i>                                 | E | Parabasalids                 |                              |
| TIGR       | Tri.va3 | <i>Trichomonas vaginalis</i>                                 | E | Parabasalids                 |                              |
| 37908704   | Tri.va4 | <i>Trichomonas vaginalis</i>                                 | E | Parabasalids                 |                              |
| 59712389   | Vib.fis | <i>Vibrio fischeri</i> ES114                                 | B | $\gamma$ -Proteobacteria     |                              |
| 27367713   | Vib.vul | <i>Vibrio vulnificus</i> CMCP6                               | B | $\gamma$ -Proteobacteria     |                              |
| 34556611   | Wol.suc | <i>Wolinella succinogenes</i>                                | B | $\epsilon$ -Proteobacteria   |                              |

## The glucosamine-6-phosphate isomerase dataset.

| gi         | Short   | Species                                                    | Domain | Group                        | Comment                      |
|------------|---------|------------------------------------------------------------|--------|------------------------------|------------------------------|
| 46143414   | Act.ple | <i>Actinobacillus pleuropneumoniae</i> serovar 1 str. 4074 | B      | $\gamma$ -Proteobacteria     |                              |
| 45509250   | Ana.var | <i>Anabaena variabilis</i> ATCC 29413                      | B      | Cyanobacteria                | 97,8% identity with Nos.sp   |
| 31239371   | Ano.gam | <i>Anopheles gambiae</i>                                   | E      | Metazoa                      |                              |
| 66547108   | Api.mel | <i>Apis mellifera</i>                                      | E      | Metazoa                      |                              |
| 40745392   | Asp.nid | <i>Aspergillus nidulans</i> FGSC A4                        | E      | Fungi                        |                              |
| 21402108   | Bac.ant | <i>Bacillus anthracis</i> A2012                            | B      | Low G+C Gram positives       |                              |
| 30022141   | Bac.cer | <i>Bacillus cereus</i> ATCC 14579                          | B      | Low G+C Gram positives       | 98,2% identity with Bac.ant  |
| 56963255   | Bac.cla | <i>Bacillus clausii</i> KSM-K16                            | B      | Low G+C Gram positives       |                              |
| 15612983   | Bac.hal | <i>Bacillus halodurans</i>                                 | B      | Low G+C Gram positives       |                              |
| 52079159   | Bac.li1 | <i>Bacillus licheniformis</i> ATCC 14580                   | B      | Low G+C Gram positives       |                              |
| 52082623   | Bac.li2 | <i>Bacillus licheniformis</i> ATCC 14580                   | B      | Low G+C Gram positives       |                              |
| 31076788   | Bac.sph | <i>Bacillus sphaericus</i>                                 | B      | Low G+C Gram positives       |                              |
| 16077305   | Bac.su1 | <i>Bacillus subtilis</i>                                   | B      | Low G+C Gram positives       |                              |
| 16080555   | Bac.su2 | <i>Bacillus subtilis</i>                                   | B      | Low G+C Gram positives       |                              |
| 60493857   | Bac.fr1 | <i>Bacteroides fragilis</i> NCTC 9343                      | B      | Bacteroidetes/Chlorobi group |                              |
| 60491888   | Bac.fr2 | <i>Bacteroides fragilis</i> NCTC 9343                      | B      | Bacteroidetes/Chlorobi group | 96,9% identity with Bac.th3  |
| 29345668   | Bac.th1 | <i>Bacteroides thetaiotaomicron</i> VPI-5482               | B      | Bacteroidetes/Chlorobi group | long                         |
| 29348995   | Bac.th2 | <i>Bacteroides thetaiotaomicron</i> VPI-5482               | B      | Bacteroidetes/Chlorobi group |                              |
| 29349535   | Bac.th3 | <i>Bacteroides thetaiotaomicron</i> VPI-5482               | B      | Bacteroidetes/Chlorobi group |                              |
| 23335426   | Bif.lon | <i>Bifidobacterium longum</i> DJO10A                       | B      | High G+C Gram positives      |                              |
| 33519783   | Blo.flo | <i>Blochmannia floridanus</i>                              | B      | $\gamma$ -Proteobacteria     |                              |
| 15594497   | Bor.bur | <i>Borrelia burgdorferi</i>                                | B      | Spirochetes                  |                              |
| 51572983   | Bor.gar | <i>Borrelia garinii</i> PBi                                | B      | Spirochetes                  |                              |
| 61811995   | Bos.tau | <i>Bos taurus</i>                                          | E      | Metazoa                      | 98,3% identity with Hom.sa1  |
| 62422909   | Bre.lin | <i>Brevibacterium linens</i> BL2                           | B      | High G+C Gram positives      |                              |
| 39586581   | Cae.bri | <i>Caenorhabditis briggsae</i>                             | E      | Metazoa                      |                              |
| 17554876   | Cae.ele | <i>Caenorhabditis elegans</i>                              | E      | Metazoa                      |                              |
| 13702164   | Can.al1 | <i>Candida albicans</i>                                    | E      | Fungi                        |                              |
| 417340     | Can.al2 | <i>Candida albicans</i>                                    | E      | Fungi                        | 99,6% identity with Can.al1  |
| 57042718   | Can.fam | <i>Canis familiaris</i>                                    | E      | Metazoa                      | 96,1% identity with Hom.sa1  |
| 15893480   | Clo.ace | <i>Clostridium acetobutylicum</i>                          | B      | Low G+C Gram positives       |                              |
| 18311416   | Clo.per | <i>Clostridium perfringens</i>                             | B      | Low G+C Gram positives       |                              |
| 28212200   | Clo.tet | <i>Clostridium tetani</i> E88                              | B      | Low G+C Gram positives       |                              |
| 38233130   | Cor.dip | <i>Corynebacterium diphtheriae</i> NCTC 13129              | B      | High G+C Gram positives      |                              |
| 25029074   | Cor.eff | <i>Corynebacterium efficiens</i> YS-314                    | B      | High G+C Gram positives      |                              |
| 19553842   | Cor.glu | <i>Corynebacterium glutamicum</i> ATCC 13032               | B      | High G+C Gram positives      |                              |
| 45522698   | Cro.wat | <i>Crocospaera watsonii</i> WH 8501                        | B      | Cyanobacteria                |                              |
| 50254779   | Cry.neo | <i>Cryptococcus neoformans</i> var. neoformans B-3501A     | E      | Fungi                        |                              |
| 23135910   | Cyt.hut | <i>Cytophaga hutchinsonii</i>                              | B      | Bacteroidetes/Chlorobi group | long                         |
| 62202396   | Dan.rer | <i>Danio rerio</i>                                         | E      | Metazoa                      |                              |
| 49657079   | Deb.han | <i>Debaryomyces hansenii</i> CBS767                        | E      | Fungi                        |                              |
| 23112797   | Des.haf | <i>Desulfitobacterium hafniense</i>                        | B      | Low G+C Gram positives       |                              |
| 60466211   | Dic.di1 | <i>Dictyostelium discoideum</i>                            | E      | Mycetozoa                    | long                         |
| 60470057   | Dic.di2 | <i>Dictyostelium discoideum</i>                            | E      | Mycetozoa                    |                              |
| 19920764   | Dro.mel | <i>Drosophila melanogaster</i>                             | E      | Metazoa                      |                              |
| 56470258   | Ent.his | <i>Entamoeba histolytica</i>                               | E      | Entamoebidae                 | long                         |
| this study | Ent.inv | <i>Entamoeba invadens</i>                                  | E      | Entamoebidae                 | long                         |
| this study | Ent.mos | <i>Entamoeba moshkovskii</i>                               | E      | Entamoebidae                 | long                         |
| this study | Ent.ter | <i>Entamoeba terrapinae</i>                                | E      | Entamoebidae                 | long                         |
| 29375097   | Ent.fa2 | <i>Enterococcus faecalis</i> V583                          | B      | Low G+C Gram positives       |                              |
| 22990925   | Ent.fa1 | <i>Enterococcus faecium</i>                                | B      | Low G+C Gram positives       |                              |
| 49610791   | Erw.car | <i>Erwinia carotovora</i> subsp. atroseptica SCRI1043      | B      | $\gamma$ -Proteobacteria     |                              |
| 20150540   | Esc.co2 | <i>Escherichia coli</i>                                    | B      | $\gamma$ -Proteobacteria     |                              |
| 3005594    | Esc.co3 | <i>Escherichia coli</i>                                    | B      | $\gamma$ -Proteobacteria     | 100,0% identity with Esc.co2 |
| 16131033   | Esc.co1 | <i>Escherichia coli</i> K12                                | B      | $\gamma$ -Proteobacteria     |                              |
| 46113349   | Exi.sp2 | <i>Exiguobacterium</i> sp. 255-15                          | B      | Low G+C Gram positives       |                              |
| 19704478   | Fus.nuc | <i>Fusobacterium nucleatum</i> subsp. nucleatum ATCC 25586 | B      | Fusobacteria                 |                              |
| 50747027   | Gal.ga1 | <i>Gallus gallus</i>                                       | E      | Metazoa                      | 95,2% identity with Hom.sa2  |
| 57525040   | Gal.ga2 | <i>Gallus gallus</i>                                       | E      | Metazoa                      |                              |
| 53130328   | Gal.ga3 | <i>Gallus gallus</i>                                       | E      | Metazoa                      | 100,0% identity with Gal.ga2 |

|            |         |                                                                 |   |                              |                                                                                                                                |
|------------|---------|-----------------------------------------------------------------|---|------------------------------|--------------------------------------------------------------------------------------------------------------------------------|
| 56420811   | Geo.kau | <i>Geobacillus kaustophilus</i> HTA426                          | B | Low G+C Gram positives       |                                                                                                                                |
| 6831555    | Gia.la1 | <i>Giardia lamblia</i>                                          | E | Diplomonads                  |                                                                                                                                |
| 6831556    | Gia.la2 | <i>Giardia lamblia</i>                                          | E | Diplomonads                  |                                                                                                                                |
| 6090573    | Gia.la3 | <i>Giardia lamblia</i>                                          | E | Diplomonads                  | 99,1% identity with Gia.la3                                                                                                    |
| 42548307   | Gib.ze1 | <i>Gibberella zeae</i> PH-1                                     | E | Fungi                        |                                                                                                                                |
| 42555043   | Gib.ze2 | <i>Gibberella zeae</i> PH-1                                     | E | Fungi                        |                                                                                                                                |
| 33152849   | Hae.duc | <i>Haemophilus ducreyi</i> 35000HP                              | B | $\gamma$ -Proteobacteria     |                                                                                                                                |
| 16272108   | Hae.inf | <i>Haemophilus influenzae</i> Rd                                | B | $\gamma$ -Proteobacteria     |                                                                                                                                |
| 32030023   | Hae.som | <i>Haemophilus somnus</i> 2336                                  | B | $\gamma$ -Proteobacteria     |                                                                                                                                |
| 13027378   | Hom.sa1 | <i>Homo sapiens</i>                                             | E | Metazoa                      |                                                                                                                                |
| 15930199   | Hom.sa2 | <i>Homo sapiens</i>                                             | E | Metazoa                      |                                                                                                                                |
| 16550419   | Hom.sa3 | <i>Homo sapiens</i>                                             | E | Metazoa                      | 98,7% identity with Hom.sa2                                                                                                    |
| 19923881   | Hom.sa4 | <i>Homo sapiens</i>                                             | E | Metazoa                      | 99,1% identity with Hom.sa2                                                                                                    |
| 58338189   | Lac.aci | <i>Lactobacillus acidophilus</i> NCFM                           | B | Low G+C Gram positives       |                                                                                                                                |
| 62513852   | Lac.cas | <i>Lactobacillus casei</i> ATCC 334                             | B | Low G+C Gram positives       |                                                                                                                                |
| 23003825   | Lac.gas | <i>Lactobacillus gasserii</i>                                   | B | Low G+C Gram positives       |                                                                                                                                |
| 42519872   | Lac.joh | <i>Lactobacillus johnsonii</i> NCC 533                          | B | Low G+C Gram positives       | 99,1% identity with Lac.gas                                                                                                    |
| 28377158   | Lac.pla | <i>Lactobacillus plantarum</i> WCFS1                            | B | Low G+C Gram positives       |                                                                                                                                |
| 15673555   | Lac.lac | <i>Lactococcus lactis</i> subsp. lactis                         | B | Low G+C Gram positives       |                                                                                                                                |
| 50955485   | Lei.xyl | <i>Leifsonia xylis</i> subsp. xylis str. CTCB07                 | B | High G+C Gram positives      |                                                                                                                                |
| Sanger     | Lei.maj | <i>Leishmania major</i>                                         | E | Euglenozoa                   |                                                                                                                                |
| 23024189   | Leu.mes | <i>Leuconostoc mesenteroides</i> subsp. mesenteroides ATCC 8293 | B | Low G+C Gram positives       |                                                                                                                                |
| 16799949   | Lis.in1 | <i>Listeria innocua</i>                                         | B | Low G+C Gram positives       |                                                                                                                                |
| 16800025   | Lis.in2 | <i>Listeria innocua</i>                                         | B | Low G+C Gram positives       | 98,7% identity with Lis.mo2                                                                                                    |
| 16801514   | Lis.in3 | <i>Listeria innocua</i>                                         | B | Low G+C Gram positives       |                                                                                                                                |
| 16802918   | Lis.mo1 | <i>Listeria monocytogenes</i> EGD-e                             | B | Low G+C Gram positives       |                                                                                                                                |
| 16802997   | Lis.mo2 | <i>Listeria monocytogenes</i> EGD-e                             | B | Low G+C Gram positives       |                                                                                                                                |
| 16804396   | Lis.mo3 | <i>Listeria monocytogenes</i> EGD-e                             | B | Low G+C Gram positives       |                                                                                                                                |
| 38102084   | Mag.gri | <i>Magnaporthe grisea</i> 70-15                                 | E | Fungi                        |                                                                                                                                |
| 23012890   | Mag.mag | <i>Magnetospirillum magnetotacticum</i>                         | B | $\alpha$ -Proteobacteria     |                                                                                                                                |
| 52308312   | Man.suc | <i>Mannheimia succiniciproducens</i> MBEL55E                    | B | $\gamma$ -Proteobacteria     |                                                                                                                                |
| this study | Mas.bal | <i>Mastigamoeba balamuthi</i>                                   | E | Pelobionts                   | fragment missing 128 of 229 aligned positions – 54,4% identity with Ent.inv; long version missing 438 of 562 aligned positions |
| 3122434    | Mes.aur | <i>Mesocricetus auratus</i>                                     | E | Metazoa                      | 96,9% identity with Hom.sa1                                                                                                    |
| 45914196   | Mes.spB | <i>Mesorhizobium</i> sp. BNC1                                   | B | $\alpha$ -Proteobacteria     |                                                                                                                                |
| 12644084   | Mus.mu1 | <i>Mus musculus</i>                                             | E | Metazoa                      | 96,9% identity with Hom.sa1                                                                                                    |
| 12853907   | Mus.mu2 | <i>Mus musculus</i>                                             | E | Metazoa                      | 97,4% identity with Hom.sa2                                                                                                    |
| 19882233   | Mus.mu3 | <i>Mus musculus</i>                                             | E | Metazoa                      | 97,4% identity with Hom.sa2                                                                                                    |
| 5353761    | Mus.mu4 | <i>Mus musculus</i>                                             | E | Metazoa                      | 97,4% identity with Hom.sa1                                                                                                    |
| 6754030    | Mus.mu5 | <i>Mus musculus</i>                                             | E | Metazoa                      | 96,1% identity with Hom.sa1                                                                                                    |
| 54020607   | Myc.hyo | <i>Mycoplasma hyopneumoniae</i> 232                             | B | Low G+C Gram positives       |                                                                                                                                |
| 42561343   | Myc.my1 | <i>Mycoplasma mycoides</i> subsp. mycoides SC str. PG1          | B | Low G+C Gram positives       |                                                                                                                                |
| 42560683   | Myc.my2 | <i>Mycoplasma mycoides</i> subsp. mycoides SC str. PG1          | B | Low G+C Gram positives       |                                                                                                                                |
| 26553629   | Myc.pen | <i>Mycoplasma penetrans</i>                                     | B | Low G+C Gram positives       |                                                                                                                                |
| 15828833   | Myc.pul | <i>Mycoplasma pulmonis</i>                                      | B | Low G+C Gram positives       |                                                                                                                                |
| 32406955   | Neu.cra | <i>Neurospora crassa</i>                                        | E | Fungi                        |                                                                                                                                |
| 23127811   | Nos.pun | <i>Nostoc punctiforme</i>                                       | B | Cyanobacteria                |                                                                                                                                |
| 17228222   | Nos.sp  | <i>Nostoc</i> sp. PCC 7120                                      | B | Cyanobacteria                |                                                                                                                                |
| 23098066   | Oce.ihe | <i>Oceanobacillus iheyensis</i> HTE831                          | B | Low G+C Gram positives       |                                                                                                                                |
| 23038068   | Oen.oen | <i>Oenococcus oeni</i> MCW                                      | B | Low G+C Gram positives       |                                                                                                                                |
| Genoscope  | Par.tet | <i>Paramecium tetraurelia</i>                                   | E | Ciliates                     | long                                                                                                                           |
| 15602740   | Pas.mul | <i>Pasteurella multocida</i>                                    | B | $\gamma$ -Proteobacteria     |                                                                                                                                |
| 48870313   | Ped.pen | <i>Pediococcus pentosaceus</i> ATCC 25745                       | B | Low G+C Gram positives       |                                                                                                                                |
| 54302040   | Pho.pr1 | <i>Photobacterium profundum</i> SS9                             | B | $\gamma$ -Proteobacteria     |                                                                                                                                |
| 54308224   | Pho.pr2 | <i>Photobacterium profundum</i> SS9                             | B | $\gamma$ -Proteobacteria     |                                                                                                                                |
| 37525283   | Pho.lum | <i>Photorhabdus luminescens</i> subsp. laumondii TTO1           | B | $\gamma$ -Proteobacteria     |                                                                                                                                |
| 55730197   | Pon.pyg | <i>Pongo pygmaeus</i>                                           | E | Metazoa                      | 99,6% identity with Hom.sa1                                                                                                    |
| 34540585   | Por.gi1 | <i>Porphyromonas gingivalis</i> W83                             | B | Bacteroidetes/Chlorobi group |                                                                                                                                |
| 34540986   | Por.gi2 | <i>Porphyromonas gingivalis</i> W83                             | B | Bacteroidetes/Chlorobi group | long                                                                                                                           |
| 33863691   | Pro.mar | <i>Prochlorococcus marinus</i> str. MIT 9313                    | B | Cyanobacteria                |                                                                                                                                |
| 50841959   | Pro.acn | <i>Propionibacterium acnes</i> KPA171202                        | B | High G+C Gram positives      |                                                                                                                                |
| 27695235   | Rat.nor | <i>Rattus norvegicus</i>                                        | E | Metazoa                      | 97,8% identity with Hom.sa2                                                                                                    |

|            |         |                                                          |   |                          |                                                                             |
|------------|---------|----------------------------------------------------------|---|--------------------------|-----------------------------------------------------------------------------|
| 32471377   | Rho.ba1 | <i>Rhodopirellula baltica</i> SH 1                       | B | Planctomycetes           |                                                                             |
| 32472019   | Rho.ba2 | <i>Rhodopirellula baltica</i> SH 1                       | B | Planctomycetes           |                                                                             |
| 32472456   | Rho.ba3 | <i>Rhodopirellula baltica</i> SH 1                       | B | Planctomycetes           |                                                                             |
| 32472581   | Rho.ba4 | <i>Rhodopirellula baltica</i> SH 1                       | B | Planctomycetes           | long                                                                        |
| 46107074   | Rub.xyl | <i>Rubrobacter xylanophilus</i> DSM 9941                 | B | High G+C Gram positives  |                                                                             |
| 16759628   | Sal.ent | <i>Salmonella enterica</i> subsp. enterica serovar Typhi | B | $\gamma$ -Proteobacteria | 95,6% identity with Esc.co2                                                 |
| 16764054   | Sal.typ | <i>Salmonella typhimurium</i> LT2                        | B | $\gamma$ -Proteobacteria | 95,6% identity with Esc.co2                                                 |
| 56756765   | Sch.jap | <i>Schistosoma japonicum</i>                             | E | Metazoa                  |                                                                             |
| 24112036   | Shi.fl1 | <i>Shigella flexneri</i> 2a str. 301                     | B | $\gamma$ -Proteobacteria | 99,6% identity with Esc.co2                                                 |
| 24114429   | Shi.fl2 | <i>Shigella flexneri</i> 2a str. 301                     | B | $\gamma$ -Proteobacteria | 98,6% identity with Esc.co1                                                 |
| 27982841   | Spi.ba1 | <i>Spironucleus barkhanus</i>                            | E | Diplomonads              | fragment missing 107 of 229 aligned positions – 68,0% identity with Spi.ba2 |
| 27983038   | Spi.ba2 | <i>Spironucleus barkhanus</i>                            | E | Diplomonads              |                                                                             |
| 15923559   | Sta.aur | <i>Staphylococcus aureus</i> subsp. aureus Mu50          | B | Low G+C Gram positives   |                                                                             |
| 27467258   | Sta.epi | <i>Staphylococcus epidermidis</i> ATCC 12228             | B | Low G+C Gram positives   |                                                                             |
| 22536963   | Str.aga | <i>Streptococcus agalactiae</i> 2603V/R                  | B | Low G+C Gram positives   |                                                                             |
| 24379109   | Str.mut | <i>Streptococcus mutans</i> UA159                        | B | Low G+C Gram positives   |                                                                             |
| 15901269   | Str.pne | <i>Streptococcus pneumoniae</i> TIGR4                    | B | Low G+C Gram positives   |                                                                             |
| 15675320   | Str.pyo | <i>Streptococcus pyogenes</i>                            | B | Low G+C Gram positives   |                                                                             |
| 50591240   | Str.sui | <i>Streptococcus suis</i> 89/1591                        | B | Low G+C Gram positives   |                                                                             |
| 62526838   | Str.the | <i>Streptococcus thermophilus</i> LMD-9                  | B | Low G+C Gram positives   |                                                                             |
| 29829560   | Str.ave | <i>Streptomyces avermitilis</i> MA-4680                  | B | High G+C Gram positives  |                                                                             |
| 21223604   | Str.coe | <i>Streptomyces coelicolor</i> A3(2)                     | B | High G+C Gram positives  |                                                                             |
| 51891744   | Sym.the | <i>Symbiobacterium thermophilum</i> IAM 14863            | B | High G+C Gram positives  |                                                                             |
| 56750455   | Syn.elo | <i>Synechococcus elongatus</i> PCC 6301                  | B | Cyanobacteria            |                                                                             |
| 33865076   | Syn.sp  | <i>Synechococcus</i> sp. WH 8102                         | B | Cyanobacteria            |                                                                             |
| TIGR       | Tet.the | <i>Tetrahymena thermophila</i>                           | E | Ciliates                 | long                                                                        |
| 47222915   | Tet.nig | <i>Tetraodon nigroviridis</i>                            | E | Metazoa                  |                                                                             |
| 20807502   | The.ten | <i>Thermoanaerobacter tengcongensis</i>                  | B | Low G+C Gram positives   |                                                                             |
| 42525853   | Tre.den | <i>Treponema denticola</i> ATCC 35405                    | B | Spirochetes              |                                                                             |
| 23043712   | Tri.ery | <i>Trichodesmium erythraeum</i> IMS101                   | B | Cyanobacteria            |                                                                             |
| this study | Tri.vag | <i>Trichomonas vaginalis</i>                             | E | Parabasalids             | long                                                                        |
| TIGR       | Try.bru | <i>Trypanosoma brucei</i>                                | E | Euglenozoa               |                                                                             |
| TIGR       | Try.cru | <i>Trypanosoma cruzi</i>                                 | E | Euglenozoa               |                                                                             |
| 46097301   | Usi.may | <i>Ustilago maydis</i> 521                               | E | Fungi                    |                                                                             |
| 15601778   | Vib.cho | <i>Vibrio cholerae</i> O1 biovar eltor str. N16961       | B | $\gamma$ -Proteobacteria |                                                                             |
| 59712964   | Vib.fis | <i>Vibrio fischeri</i> ES114                             | B | $\gamma$ -Proteobacteria |                                                                             |
| 28899893   | Vib.par | <i>Vibrio parahaemolyticus</i> RIMD 2210633              | B | $\gamma$ -Proteobacteria |                                                                             |
| 27367580   | Vib.vul | <i>Vibrio vulnificus</i> CMCP6                           | B | $\gamma$ -Proteobacteria |                                                                             |
| 38014747   | Xen.la1 | <i>Xenopus laevis</i>                                    | E | Metazoa                  |                                                                             |
| 38014417   | Xen.la2 | <i>Xenopus laevis</i>                                    | E | Metazoa                  |                                                                             |
| 49647197   | Yar.lip | <i>Yarrowia lipolytica</i> CLIB99                        | E | Fungi                    |                                                                             |
| 16122840   | Yer.pes | <i>Yersinia pestis</i>                                   | B | $\gamma$ -Proteobacteria |                                                                             |
| 51595466   | Yer.pse | <i>Yersinia pseudotuberculosis</i> IP 32953              | B | $\gamma$ -Proteobacteria | 100,0% identity with Yer.pes                                                |

---

## The alcohol dehydrogenase E dataset.

| gi         | Short   | Species                                                    | Domain | Group                    | Comment                      |
|------------|---------|------------------------------------------------------------|--------|--------------------------|------------------------------|
| 46143771   | Act.ple | <i>Actinobacillus pleuropneumoniae</i> serovar 1 str. 4074 | B      | $\gamma$ -Proteobacteria |                              |
| 30264441   | Bac.ant | <i>Bacillus anthracis</i> str. Ames                        | B      | Low G+C Gram positives   | 97,0% identity with Bac.cer  |
| 30022446   | Bac.cer | <i>Bacillus cereus</i> ATCC 14579                          | B      | Low G+C Gram positives   |                              |
| 52005783   | Bac.lic | <i>Bacillus licheniformis</i> ATCC 14580                   | B      | Low G+C Gram positives   |                              |
| 49476825   | Bac.thu | <i>Bacillus thuringiensis</i> serovar konkukian str. 97-27 | B      | Low G+C Gram positives   | 96,9% identity with Bac.thu  |
| 23336499   | Bif.lon | <i>Bifidobacterium longum</i> DJO10A                       | B      | High G+C Gram positives  |                              |
| JGI        | Chl.rei | <i>Chlamydomonas reinhardtii</i>                           | E      | Green algae              |                              |
| 34496592   | Chr.vio | <i>Chromobacterium violaceum</i> ATCC 12472                | B      | $\beta$ -Proteobacteria  |                              |
| 15004739   | Clo.ac1 | <i>Clostridium acetobutylicum</i>                          | B      | Low G+C Gram positives   |                              |
| 15004865   | Clo.ac2 | <i>Clostridium acetobutylicum</i>                          | B      | Low G+C Gram positives   |                              |
| 18311513   | Clo.per | <i>Clostridium perfringens</i>                             | B      | Low G+C Gram positives   |                              |
| 28211045   | Clo.tet | <i>Clostridium tetani</i> E88                              | B      | Low G+C Gram positives   |                              |
| 23020357   | Clo.the | <i>Clostridium thermocellum</i> ATCC 27405                 | B      | Low G+C Gram positives   |                              |
| 54659250   | Cry.hom | <i>Cryptosporidium hominis</i>                             | E      | Apicomplexa              | 100,0% identity with Cry.par |
| 46228815   | Cry.par | <i>Cryptosporidium parvum</i>                              | E      | Apicomplexa              |                              |
| 56473007   | Ent.hi1 | <i>Entamoeba histolytica</i> HM-1:IMSS                     | E      | Entamoebidae             |                              |
| 56467638   | Ent.hi2 | <i>Entamoeba histolytica</i> HM-1:IMSS                     | E      | Entamoebidae             | 99,9% identity with Ent.hi1  |
| 56465626   | Ent.hi3 | <i>Entamoeba histolytica</i> HM-1:IMSS                     | E      | Entamoebidae             | 99,9% identity with Ent.hi1  |
| 56472980   | Ent.hi4 | <i>Entamoeba histolytica</i> HM-1:IMSS                     | E      | Entamoebidae             | 99,9% identity with Ent.hi1  |
| this study | Ent.inv | <i>Entamoeba invadens</i>                                  | E      | Entamoebidae             |                              |
| this study | Ent.mos | <i>Entamoeba moshkovskii</i>                               | E      | Entamoebidae             |                              |
| this study | Ent.ter | <i>Entamoeba terrapinae</i>                                | E      | Entamoebidae             |                              |
| 29375484   | Ent.fas | <i>Enterococcus faecalis</i> V583                          | B      | Low G+C Gram positives   |                              |
| 22992835   | Ent.fam | <i>Enterococcus faecium</i>                                | B      | Low G+C Gram positives   |                              |
| 49611780   | Erw.car | <i>Erwinia carotovora</i> subsp. atroseptica SCR11043      | B      | $\gamma$ -Proteobacteria |                              |
| 15801467   | Esc.col | <i>Escherichia coli</i> O157:H7 EDL933                     | B      | $\gamma$ -Proteobacteria |                              |
| 45531125   | Exi.sp2 | <i>Exiguobacterium</i> sp. 255-15                          | B      | Low G+C Gram positives   |                              |
| 2052472    | Gia.la1 | <i>Giardia intestinalis</i>                                | E      | Diplomonads              |                              |
| 29247272   | Gia.la2 | <i>Giardia lamblia</i> ATCC 50803                          | E      | Diplomonads              | 97,3% identity with Gia.la1  |
| 58336794   | Lac.aci | <i>Lactobacillus acidophilus</i> NCFM                      | B      | Low G+C Gram positives   |                              |
| 23002679   | Lac.gas | <i>Lactobacillus gasseri</i>                               | B      | Low G+C Gram positives   | 97,2% identity with Lac.joh  |
| 42519642   | Lac.joh | <i>Lactobacillus johnsonii</i> NCC 533                     | B      | Low G+C Gram positives   |                              |
| 28379962   | Lac.pla | <i>Lactobacillus plantarum</i> WCFS1                       | B      | Low G+C Gram positives   |                              |
| 15674137   | Lac.la1 | <i>Lactococcus lactis</i> subsp. lactis                    | B      | Low G+C Gram positives   |                              |
| 27527171   | Leu.mes | <i>Leuconostoc mesenteroides</i> subsp. cremoris           | B      | Low G+C Gram positives   |                              |
| 16800743   | Lis.inn | <i>Listeria innocua</i>                                    | B      | Low G+C Gram positives   | 99,4% identity with Lis.mon  |
| 45549371   | Lis.iva | <i>Listeria ivanovii</i>                                   | B      | Low G+C Gram positives   | 98,6% identity with Lis.mon  |
| 16803674   | Lis.mon | <i>Listeria monocytogenes</i> EGD-e                        | B      | Low G+C Gram positives   |                              |
| 45549373   | Lis.see | <i>Listeria seeligeri</i>                                  | B      | Low G+C Gram positives   | 99,2% identity with Lis.mon  |
| 45549375   | Lis.wel | <i>Listeria welshimeri</i>                                 | B      | Low G+C Gram positives   | 98,2% identity with Lis.mon  |
| 52308297   | Man.suc | <i>Mannheimia succiniciproducens</i> MBEL55E               | B      | $\gamma$ -Proteobacteria |                              |
| 21435953   | Mas.bal | <i>Mastigamoeba balamuthi</i>                              | E      | Pelobionts               |                              |
| 23037201   | Oen.oen | <i>Oenococcus oeni</i> MCW                                 | B      | Low G+C Gram positives   |                              |
| 15603318   | Pas.mul | <i>Pasteurella multocida</i>                               | B      | $\gamma$ -Proteobacteria |                              |
| 54308296   | Pho.pro | <i>Photobacterium profundum</i> SS9                        | B      | $\gamma$ -Proteobacteria |                              |
| 37526388   | Pho.lum | <i>Photorhabdus luminescens</i> subsp. laumondii TTO1      | B      | $\gamma$ -Proteobacteria |                              |
| 33578055   | Pir.sp  | <i>Piromyces</i> sp. E2                                    | E      | Fungi                    |                              |
| 40644910   | Pol.sp. | <i>Polytomella</i> sp. Pringsheim 198.80                   | E      | Green algae              |                              |
| 16760134   | Sal.ent | <i>Salmonella enterica</i> subsp. enterica serovar Typhi   | B      | $\gamma$ -Proteobacteria | 98,0% identity with Esc.col  |
| 16765093   | Sal.typ | <i>Salmonella typhimurium</i> LT2                          | B      | $\gamma$ -Proteobacteria | 98,1% identity with Esc.col  |
| 24373696   | She.one | <i>Shewanella oneidensis</i> MR-1                          | B      | $\gamma$ -Proteobacteria |                              |
| 24112636   | Shi.fle | <i>Shigella flexneri</i> 2a str. 301                       | B      | $\gamma$ -Proteobacteria | 100,0% identity with Esc.col |
| 27983190   | Spi.bar | <i>Spironucleus barkhanus</i>                              | E      | Diplomonads              |                              |
| 15923138   | Sta.aur | <i>Staphylococcus aureus</i> subsp. aureus Mu50            | B      | Low G+C Gram positives   |                              |
| 27467424   | Sta.epi | <i>Staphylococcus epidermidis</i> ATCC 12228               | B      | Low G+C Gram positives   |                              |
| 22536238   | Str.aga | <i>Streptococcus agalactiae</i> 2603V/R                    | B      | Low G+C Gram positives   | 95,0% identity with Str.pyo  |
| 34787345   | Str.bov | <i>Streptococcus bovis</i>                                 | B      | Low G+C Gram positives   |                              |
| 24378663   | Str.mut | <i>Streptococcus mutans</i> UA159                          | B      | Low G+C Gram positives   |                              |
| 15901847   | Str.pne | <i>Streptococcus pneumoniae</i> TIGR4                      | B      | Low G+C Gram positives   |                              |
| 21909572   | Str.pyo | <i>Streptococcus pyogenes</i> MGAS315                      | B      | Low G+C Gram positives   |                              |
| 50590075   | Str.sui | <i>Streptococcus suis</i> 89/1591                          | B      | Low G+C Gram positives   |                              |



|          |         |                                                    |   |                          |                             |
|----------|---------|----------------------------------------------------|---|--------------------------|-----------------------------|
| 22297771 | The.elo | <i>Thermosynechococcus elongatus</i> BP-1          | B | Cyanobacteria            |                             |
| 58578286 | unc.bac | <i>uncultured bacterium</i>                        | B |                          |                             |
| 15642035 | Vib.cho | <i>Vibrio cholerae</i> O1 biovar eltor str. N16961 | B | $\gamma$ -Proteobacteria |                             |
| 59711525 | Vib.fis | <i>Vibrio fischeri</i> ES114                       | B | $\gamma$ -Proteobacteria |                             |
| 28898895 | Vib.par | <i>Vibrio parahaemolyticus</i> RIMD 2210633        | B | $\gamma$ -Proteobacteria | 95,1% identity with Vib.cho |
| 37679359 | Vib.vul | <i>Vibrio vulnificus</i> YJ016                     | B | $\gamma$ -Proteobacteria | 96,9% identity with Vib.cho |
| 16122410 | Yer.pes | <i>Yersinia pestis</i>                             | B | $\gamma$ -Proteobacteria |                             |

---
