# Supplementary material for: Evolution of four gene families with patchy phylogenetic distributions: influx of genes into protist genomes
Source: PubMed Central journal article supplement (PMC1484493; doi:10.1186/1471-2148-6-27), 2006-03-21
Supplement: 1471-2148-6-27-S2.pdf [file 1471-2148-6-27-S2.pdf]

## Additional File 2 – Andersson *et al.*

### Summary of the datasets used in the phylogenetic analyses.

|                                                          | <i>priS</i> | <i>fprA</i> | <i>nagB-short</i> | <i>nagB-long</i> | <i>adhE</i> |
|----------------------------------------------------------|-------------|-------------|-------------------|------------------|-------------|
| Total number of taxa in dataset                          | 76          | 125         | 164               | 14               | 68          |
| Number of excluded redundant sequences (>95% identical)  | 13          | 15          | 27                | 0                | 18          |
| Number of truncated sequences (<67% of alignment length) | 1           | 1           | 2                 | 1                | 0           |
| Number of taxa included in the phylogenetic analysis     | 62          | 109         | 135               | 13               | 50          |
| Number of unambiguously aligned aa positions             | 417         | 269         | 229               | 560              | 796         |
| Preferred substitution model (ML)                        | WAG+I+G     | WAG+G       | WAG+G             | RtREV+G          | WAG+I+G     |
| P <sub>inv</sub> (ML)                                    | 0.085       | 0           | 0                 | 0                | 0.092       |
| α (ML)                                                   | 1.319       | 1.951       | 1.227             | 0.871            | 1.386       |
| Preferred ASRV model (grouped aa)                        | I+G         | I+G         | I+G               | G                | I+G         |
| $p_i$ (grouped aa)                                       | 0.46        | <b>0.00</b> | <b>0.02</b>       | 0.60             | <b>0.00</b> |
| P <sub>sim</sub> (grouped aa)                            | 0.15        | <b>0.00</b> | <b>0.00</b>       | 0.57             | <b>0.00</b> |
| P <sub>chi-square</sub> (grouped aa)                     | 1.00        | 0.15        | 1.00              | 1.00             | 0.89        |
| P <sub>sim</sub> (original dataset)                      | <b>0.00</b> | <b>0.00</b> | <b>0.00</b>       | <b>0.00</b>      | <b>0.00</b> |
| P <sub>chi-square</sub> (original dataset)               | 1.00        | <b>0.00</b> | <b>0.00</b>       | 1.00             | 1.00        |

$p_i$ : Values for the MCMC posterior predictive simulations [1]

P<sub>sim</sub>: P values for composition homogeneity test using simulations to get the null distribution [1]

P<sub>chi-square</sub>: P values for composition homogeneity test using the  $\chi^2$  curve to get the null distribution [1]

## References

1. Foster PG: **Modeling compositional heterogeneity**. *Syst Biol* 2004, **53**:485-495.
